# Supplementary material
Source: PubMed Central journal article supplement (PMC3537778)
Supplement: supp_121505_cerv-dickinson-4-at.pdf [file supp_121505_cerv-dickinson-4-at.pdf]

#### Appendix 4 (as supplied by the authors): Incidence of and Mortality from Cervical Cancer in Women Aged <30 years, Canada, 1972-1976 and 2002-2006

| Age Group (years) | Incidence of Cervical Cancer |                  |           |                  | Deaths from Cervical Cancer |                  |           |                  |
|-------------------|------------------------------|------------------|-----------|------------------|-----------------------------|------------------|-----------|------------------|
|                   | 1972-1976                    |                  | 2002-2006 |                  | 1972-1976                   |                  | 2002-2006 |                  |
|                   | Number                       | Rate per 100,000 | Number    | Rate per 100,000 | Number                      | Rate per 100,000 | Number    | Rate per 100,000 |
| 15-19             | 15                           | 0.3              | 9         | 0.2              | Suppressed*                 | Suppressed*      | 0         | 0.0              |
| 20-24             | 143                          | 2.7              | 70        | 1.3              | 5                           | 0.1              | 9         | 0.2              |
| 25-29             | 429                          | 9.1              | 355       | 6.7              | 30                          | 0.6              | 31        | 0.6              |

\*Rates based on 1 to 4 observations for mortality were suppressed

The data contained in this figure were provided to the Public Health Agency of Canada from the Canadian Cancer Registry database and the Vital Statistics databases at Statistics Canada, with the knowledge and consent of the provincial and territorial cancer registries and vital statistics registrars which supply the data to Statistics Canada. Their cooperation is gratefully acknowledged.
