# Supplementary material
Source: PubMed Central journal article supplement (PMC3537778)
Supplement: supp_121505_cerv-dickinson-7-at.pdf [file supp_121505_cerv-dickinson-7-at.pdf]

## Appendix 7 (as supplied by the authors): Proposed Performance Indicators

| Performance indicator                                                                                                                                                                                                                                                                                                                               | Inclusion/Exclusion Criteria and Technical Notes                                                                |
|-----------------------------------------------------------------------------------------------------------------------------------------------------------------------------------------------------------------------------------------------------------------------------------------------------------------------------------------------------|-----------------------------------------------------------------------------------------------------------------|
| Screening Rate: Percentage of eligible women in the target population who are screened within a 3 year time interval. Time scale should allow for some variation: up to 3.5 years.                                                                                                                                                                  | Must have been sexually active                                                                                  |
| Proportion of women screened with an abnormal Pap test result: by category of abnormality                                                                                                                                                                                                                                                           | Must have a cervix                                                                                              |
| Rate of subsequent tests: Proportion of women with positive Pap smear undergoing colposcopy and biopsy, by category of abnormality.                                                                                                                                                                                                                 | Are not immunocompromised                                                                                       |
| Pre-cancer Detection Rate: Number of pre-cancerous lesions (LSIL and HSIL)* detected per 1,000 women screened in a 3-year period.                                                                                                                                                                                                                   | Are not being followed up for abnormalities                                                                     |
| After a negative screening test, time intervals for repeat screening for eligible women. The intervals of special interest would include<br>Within 1-2.5 years (measure of screening at short intervals)<br>In 2.5 to 3.5 years (i.e. close to the recommended interval of 3 years-the range in this performance indicator to allow for scheduling) | Stratify analysis by age group (<20, 20-24, 25-29, 30-39, 70+), ethnicity, and other high risk characteristics. |
| Rate of discussion of potential benefits, risks and limitations of cervical cancer screening with eligible women.                                                                                                                                                                                                                                   |                                                                                                                 |

\* LSIL: low grade squamous intraepithelial lesion, HSIL: high grade squamous intraepithelial lesion
